# Supplementary material
Source: publisher figshare collection journal article supplement (https://karger.figshare.com/articles/dataset/_/5576743)

## Influir en la percepción y la preferencia de sabor de los bebés para favorecer su salud a largo plazo

Los patrones adquiridos en los primeros meses de vida pueden marcar las preferencias de sabor más adelante.

Está generalmente aceptado que el consumo de productos azucarados aumenta el riesgo de ENT (enfermedades no transmisibles).

Las primeras experiencias sensoriales influyen en estos patrones. Si la madre lleva una dieta saludable, es más probable que su hijo también prefiera alimentos sanos.

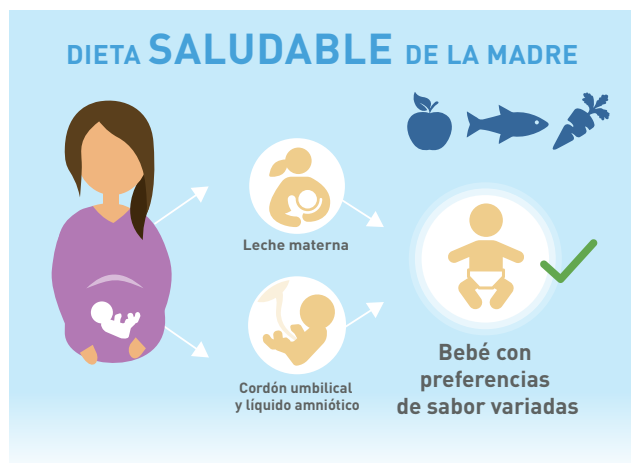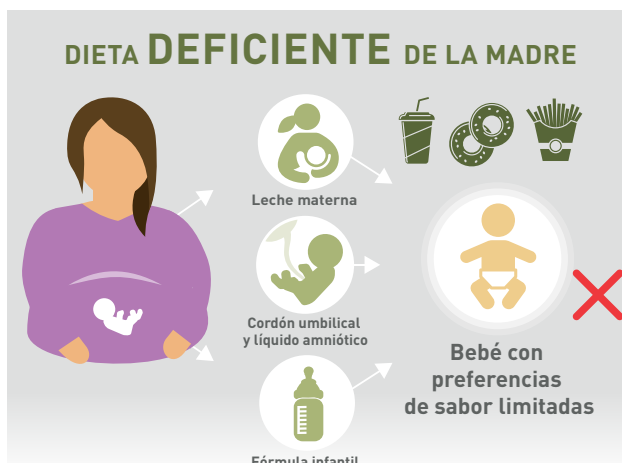

## Relación entre la nutrición infantil y la salud en la edad adulta

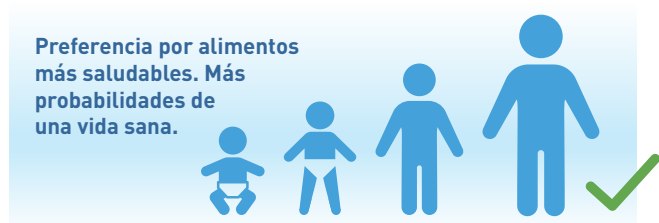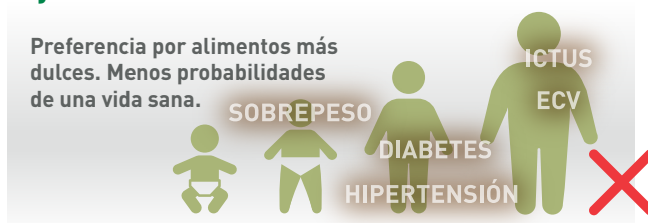

## Predisposición a preferir los alimentos dulces a los amargos

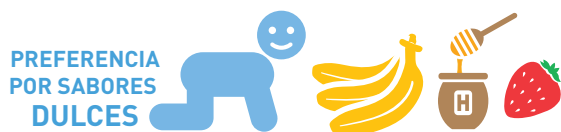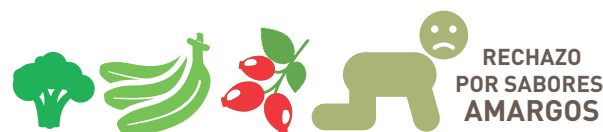

## Rapidez de la formación de preferencias alimentarias y alimentación complementaria

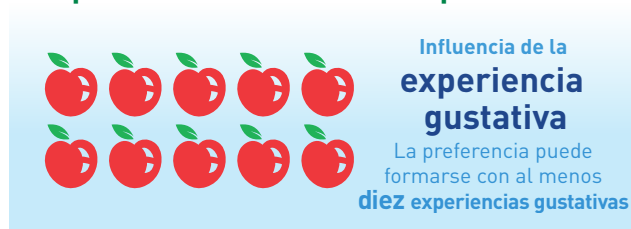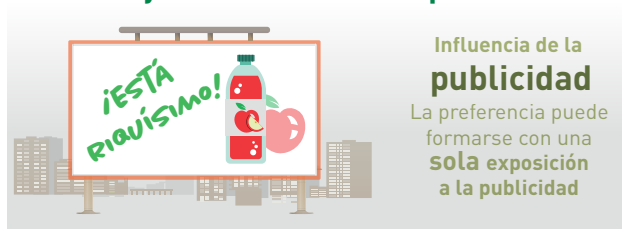

La preferencia por los alimentos saludables se puede incentivar mediante una exposición temprana a sus sabores, sin embargo, también hay que contrarrestar la influencia de la publicidad de alimentos dulces en el hogar.

Influir en la percepción y la preferencia de sabor de los bebés para favorecer su salud a largo plazo

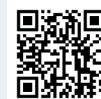

Supplement: Supplementary file 1 [file 6]
