# Supplementary material
Source: publisher figshare collection journal article supplement (https://karger.figshare.com/articles/dataset/_/5576743)

## Влияние на вкусовые ощущения и предпочтения детей с целью сохранения здоровья

Питание в первые месяцы жизни может сформировать вкусовые предпочтения.

Общеизвестно, что потребление подслащенных продуктов повышает риск развития НИЗ (неинфекционных заболеваний).

Ощущения, испытанные в раннем возрасте, влияют на эти модели. Здоровое питание матери увеличивает вероятность того, что ее ребенок тоже будет предпочитать полезную еду.

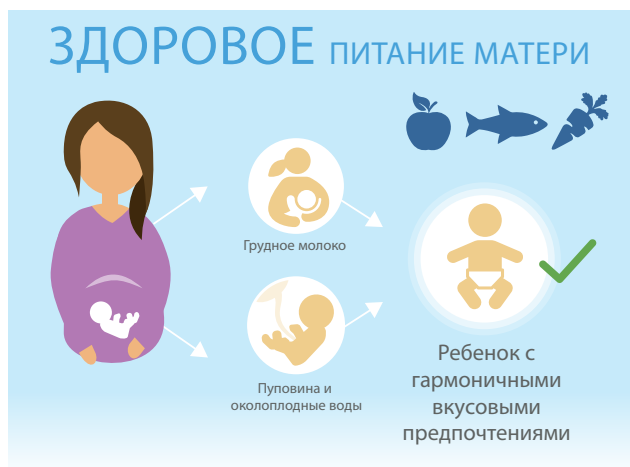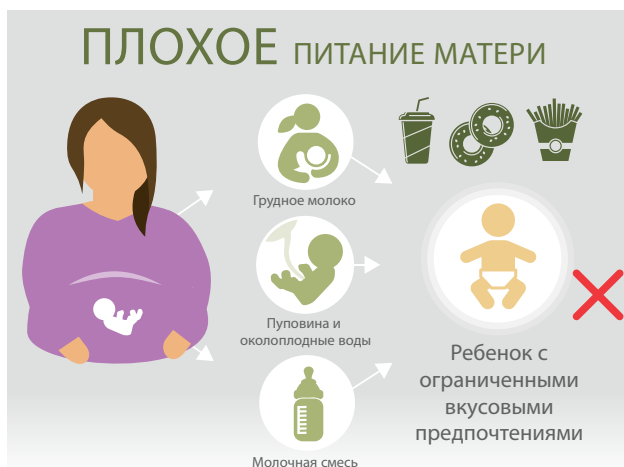

## Связь между питанием ребенка и его здоровьем в будущем

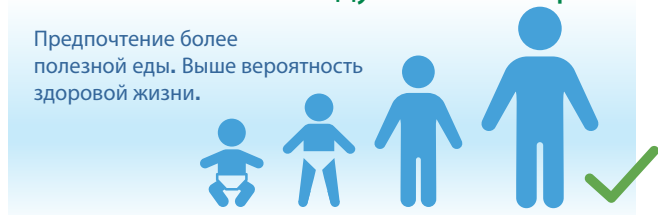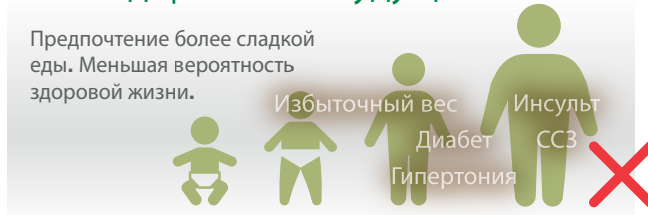

## Склонность к предпочтению сладкой еды горькой

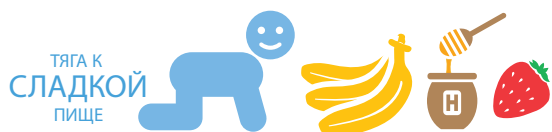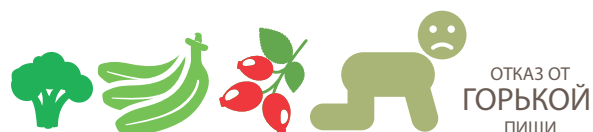

## Темп развития предпочтения в еде и прикорм

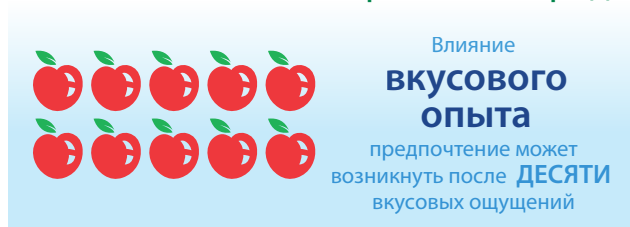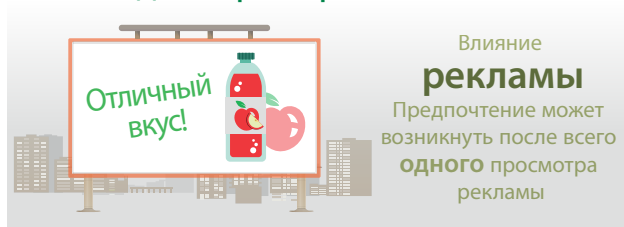

Формированию предпочтения полезной еды способствует раннее знакомство с ее вкусом, кроме того, в семье следует ограничить влияние на детей рекламы сладкой пищи.

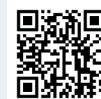

Supplement: Supplementary file 2 [file 6]
