# Supplementary material
Source: publisher figshare collection journal article supplement (https://karger.figshare.com/articles/dataset/_/5576743)

## 影响婴儿的味觉和口味偏好， 有利于保持长期健康

婴儿在生命最初几个月形成的习惯会影响其一生的口味偏好。

通常认为摄入含糖产品会增加 NCD (非传染性疾病) 的患病风险。

早期感官体验会影响这些习惯。母亲饮食健康，则会增加孩子喜欢同样健康食品的可能性。

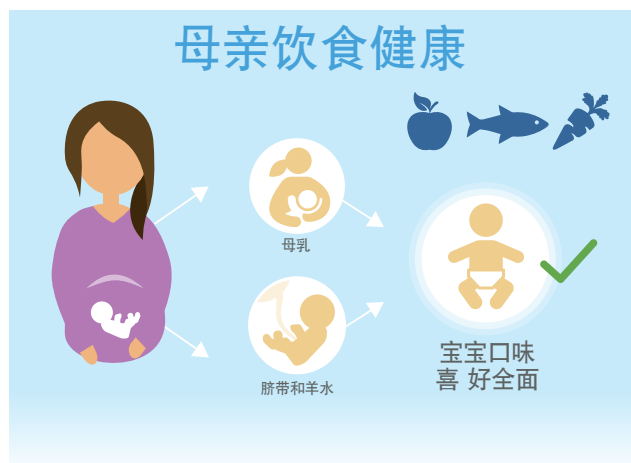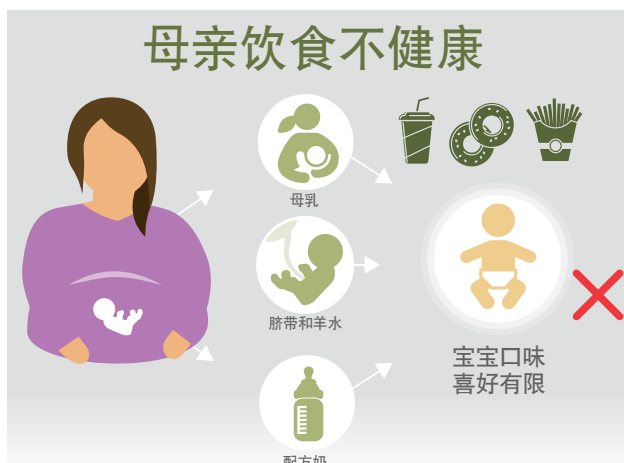

## 婴儿营养与今后健康的关系

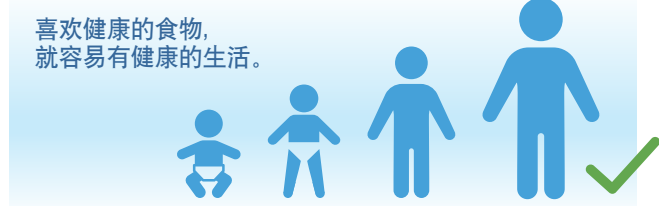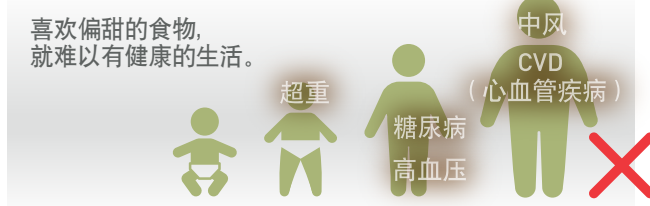

## 相较苦味食物，更喜欢甜味食物

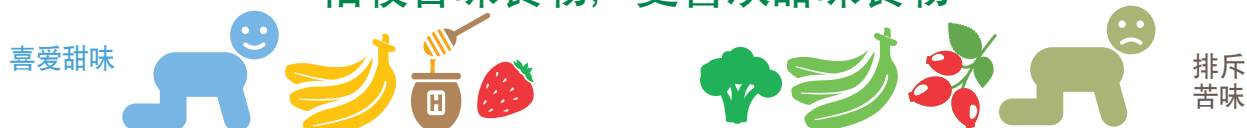

## 食物喜好形成的速度与辅食喂养

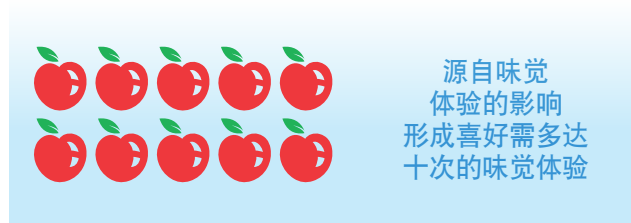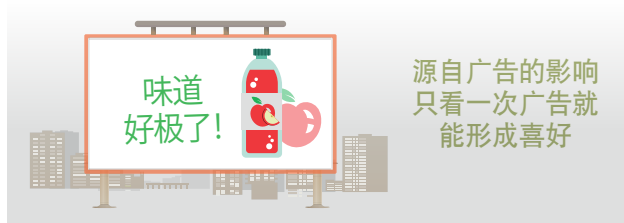

可通过在早期接触健康食物来鼓励婴儿形成对健康食物的喜好，  
但在家仍需坚决消除甜味食品广告的影响。

影响婴儿的味觉和口味偏好，有利于长期保持健康

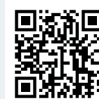

Supplement: Supplementary file 3 [file 6]
