# Supplementary material
Source: publisher figshare collection journal article supplement (https://karger.figshare.com/articles/dataset/_/5576743)
Supplement: Supplementary file 4 [file 6]

Archive with 8 entries (8 files):
- 8.Chinese_NESTLE_infographic_FINAL_210x280.pdf
- 1.English_NESTLE_infographic_FINAL_210x280_aw.pdf
- 2.Spanish_NESTLE_infographic_FINAL_210x280_aw.pdf
- 3.French_NESTLE_infographic_FINAL_210x280_aw.pdf
- 4.German_NESTLE_infographic_FINAL_210x280_aw.pdf
- 5.BrazilianPortuguese_NESTLE_infographic_FINAL_210x280_aw.pdf
- 6.Russian_NESTLE_infographic_FINAL_210x280.pdf
- 7.Vietnamese_NESTLE_infographic_FINAL_210x280[1].pdf
