# Supplementary material
Source: publisher figshare collection journal article supplement (https://karger.figshare.com/articles/dataset/_/5576743)

## Influencer le goût chez le nourrisson afin de favoriser sa santé à long terme

Les habitudes prises dès les premiers mois peuvent façonner les préférences alimentaires pour toute la vie.

Il est admis que la consommation de produits édulcorés accroît le risque de MNT (maladies non transmissibles).

Les premières expériences sensorielles influencent les habitudes alimentaires. Si la mère consomme des aliments sains, il est probable que l'enfant préférera également une nourriture saine.

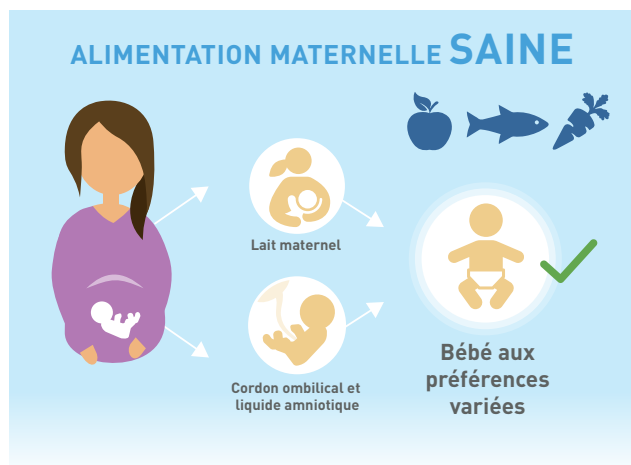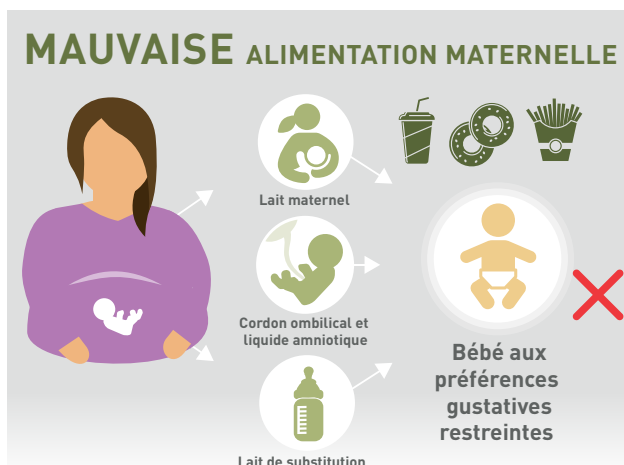

### Lien entre nutrition infantile et santé à long terme

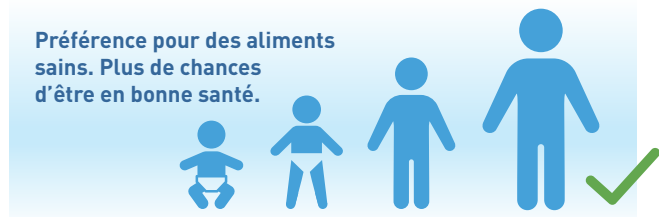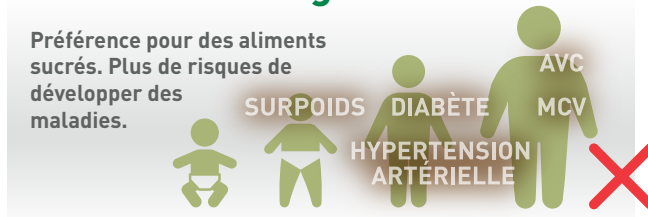

### Prédisposition à préférer le sucré à l'amer

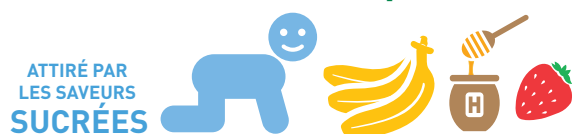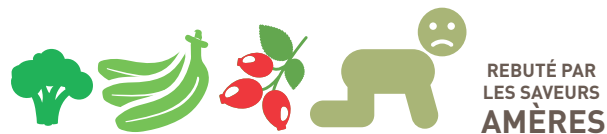

### Formation du goût et alimentation complémentaire

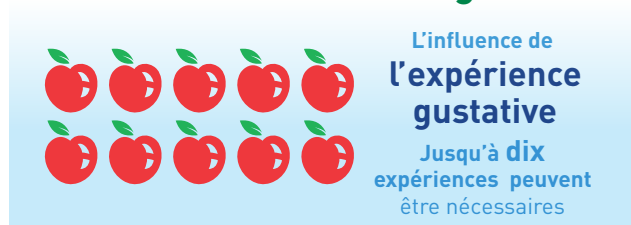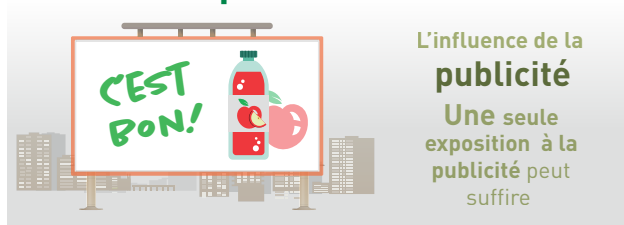

La préférence pour des aliments sains peut être encouragée par l'exposition précoce aux saveurs de ces derniers, alors que l'influence de la publicité pour les aliments sucrés doit être fermement contrecarrée à la maison.

Influencer le goût du nourrisson pour favoriser sa bonne santé future

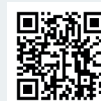

Supplement: Supplementary file 4 [file 6 › 3.French_NESTLE_infographic_FINAL_210x280_aw.pdf]
