# Supplementary material
Source: publisher figshare collection journal article supplement (https://karger.figshare.com/articles/dataset/_/5576743)

## Einfluss auf die Geschmackswahrnehmung und -vorlieben des Säuglings nehmen – für eine lange Gesundheit

Schon in der Schwangerschaft können sich Geschmacksvorlieben entwickeln, die ein Leben lang bestehen bleiben.

Es ist allgemein anerkannt, dass der Konsum von mit Zucker gesüßten Lebensmitteln das Risiko für nicht übertragbare Krankheiten erhöht.

Frühe sensorische Erfahrungen beeinflussen diese Vorlieben. Ernährt sich die Mutter gesund, ist es wahrscheinlicher, dass ihr Kind ebenfalls gesunde Lebensmittel bevorzugt.

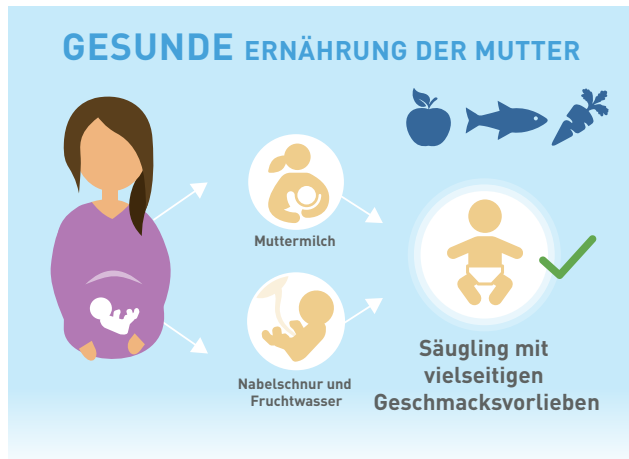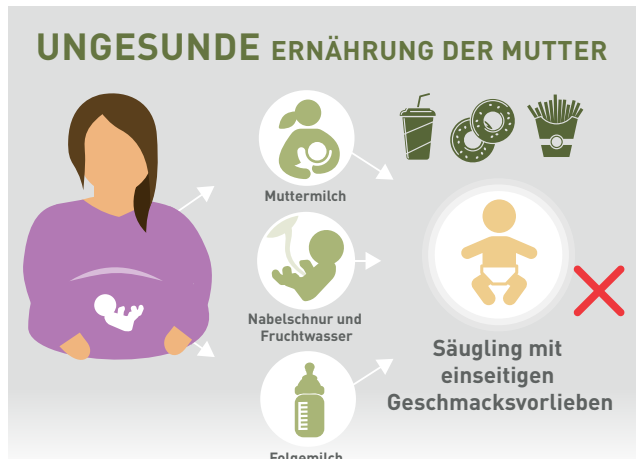

### Zusammenhang von Ernährung des Säuglings und der Gesundheit im späteren Leben

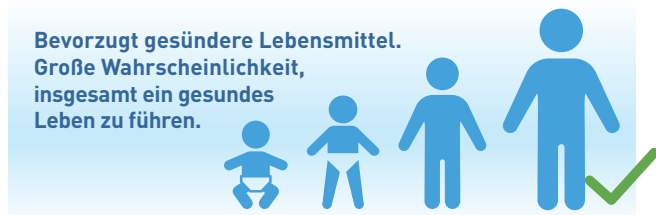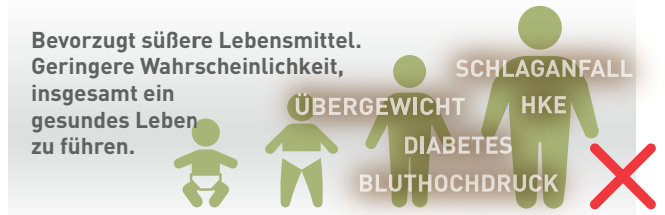

### Von Anfang an Bevorzugung von süßen vor bitter schmeckenden Lebensmitteln

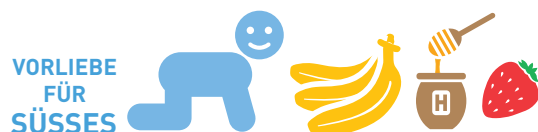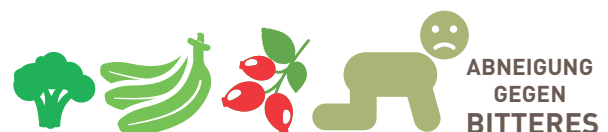

### So schnell prägt sich im Beikostalter eine Geschmacksvorliebe aus

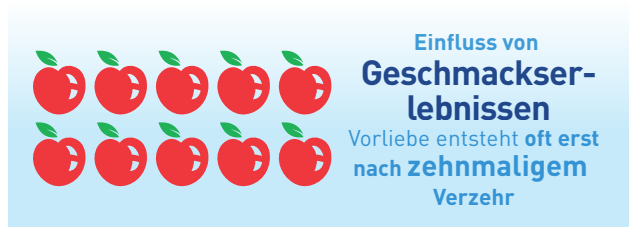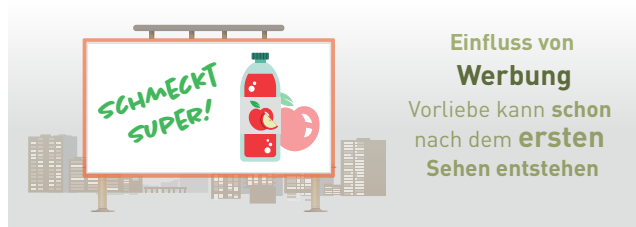

Eine Vorliebe für gesunde Lebensmittel kann durch entsprechende frühe Geschmackserlebnisse gefördert werden, wohingegen dem Einfluss von Werbung für süße Nahrungsmittel zu Hause konsequent entgegengewirkt werden sollte.

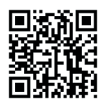

Supplement: Supplementary file 4 [file 6 › 4.German_NESTLE_infographic_FINAL_210x280_aw.pdf]
