# Supplementary material
Source: publisher figshare collection journal article supplement (https://karger.figshare.com/articles/dataset/_/5576743)

## Influência da percepção e preferência de sabores na saúde dos bebês em longo prazo

Hábitos formados nos primeiros meses de vida podem moldar as preferências de paladar por toda a vida.

É geralmente aceito que o consumo de produtos que contêm açúcar aumenta os riscos de DNT (doenças não-transmissíveis).

Experiências sensoriais precoces influenciam esses hábitos. Mães que seguem uma dieta saudável aumentam a probabilidade de que seus filhos prefiram os mesmos alimentos saudáveis.

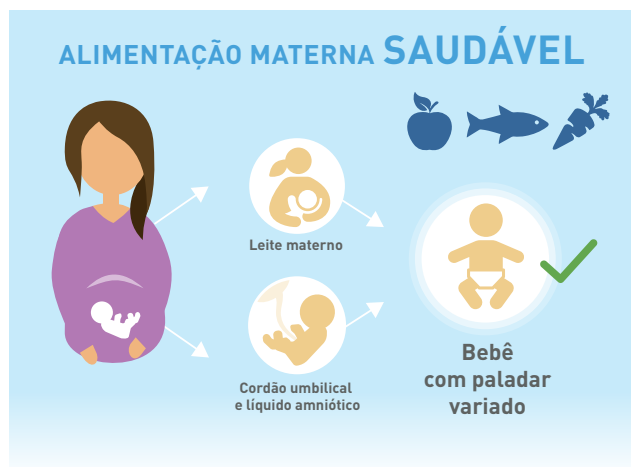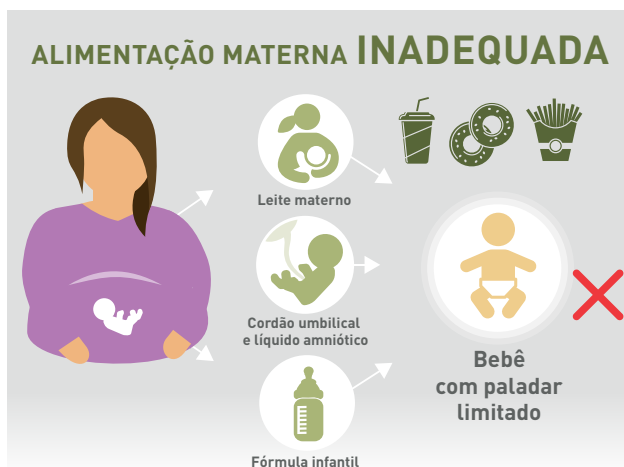

### Relação entre nutrição infantil e saúde na vida adulta

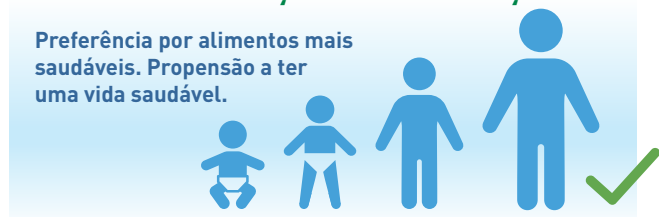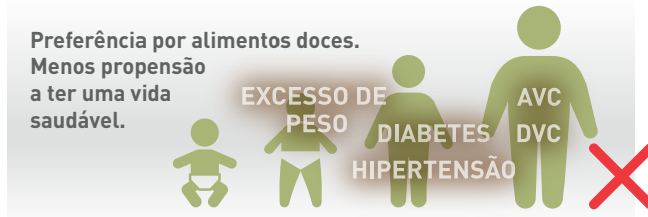

### Predisposição a preferir alimentos doces a alimentos de sabor amargo

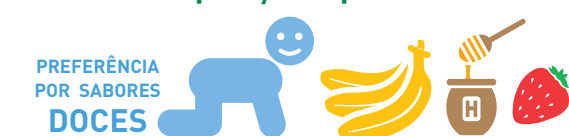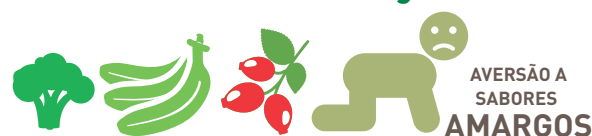

### Velocidade de formação de preferências alimentares e alimentação complementar

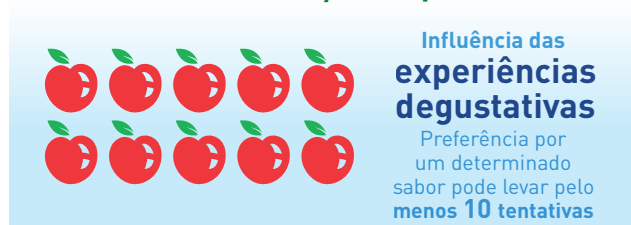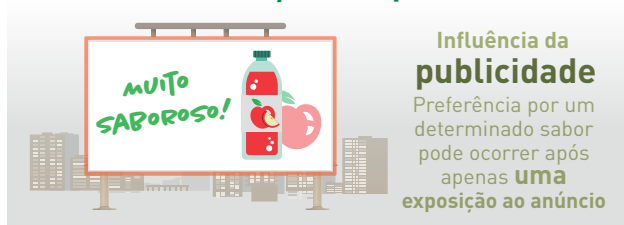

A preferência por alimentos saudáveis pode ser incentivada pela exposição precoce aos seus sabores, porém a influência da publicidade de alimentos doces deve ser firmemente combatida em casa.

#### Influência da percepção e preferência de sabores na saúde dos bebês em longo prazo

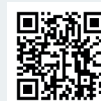

Supplement: Supplementary file 4 [file 6 › 5.BrazilianPortuguese_NESTLE_infographic_FINAL_210x280_aw.pdf]
