# Supplementary material
Source: publisher figshare collection journal article supplement (https://karger.figshare.com/articles/dataset/_/5576743)

## Tác động đến nhận biết và sở thích mùi vị của trẻ nhỏ vì sức khỏe lâu dài

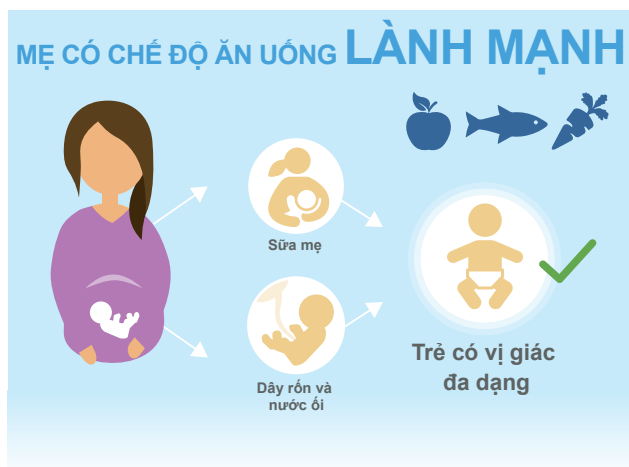

Những khuôn mẫu hình thành từ những tháng đầu đời có thể định hình sở thích mùi vị trong cả cuộc đời.

Nhìn chung, việc tiêu thụ các thực phẩm ngọt thường làm tăng nguy cơ mắc các bệnh không lây.

Trải nghiệm giác quan ngay từ sớm có ảnh hưởng đến những khuôn mẫu này. Nếu người mẹ duy trì chế độ ăn uống lành mạnh, nhiều khả năng trẻ cũng thích các thực phẩm lành mạnh.

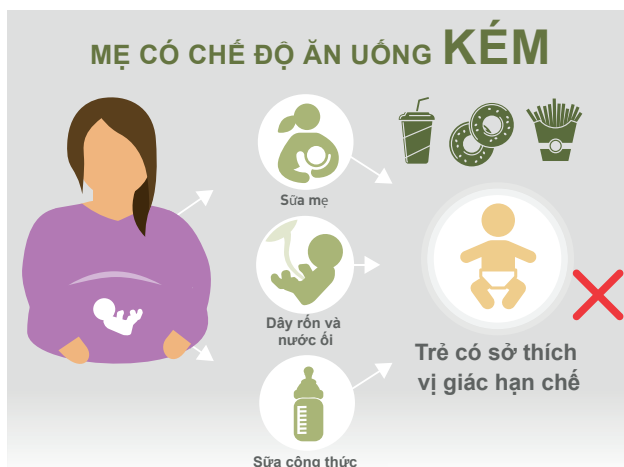

## Mối liên hệ giữa dinh dưỡng ở trẻ sơ sinh và sức khỏe về sau

Thích thực phẩm lành mạnh hơn.  
Nhiều khả năng có cuộc sống khỏe mạnh.

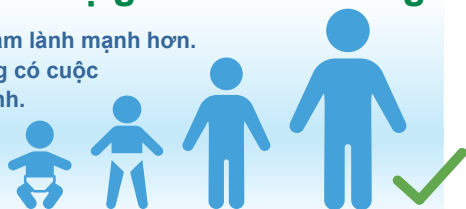

Thích thực phẩm ngọt hơn.  
Ít khả năng có cuộc sống khỏe mạnh.

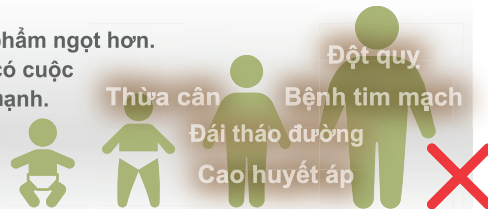

## Có khuynh hướng thích thức ăn có vị ngọt hơn vị đắng

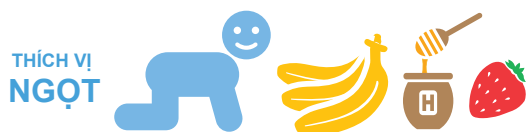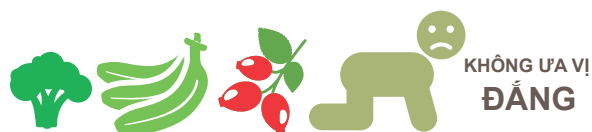

## Tốc độ hình thành sở thích về thức ăn và quá trình ăn dặm

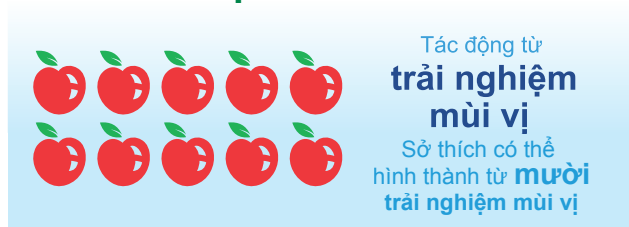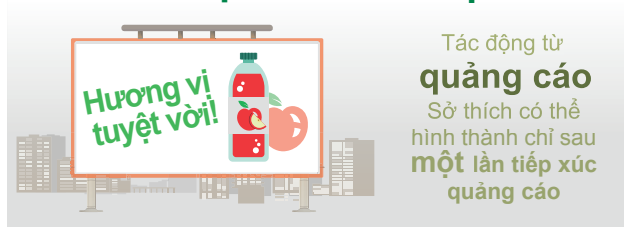

Bên cạnh việc cần tích cực chống lại tác động của quảng cáo thực phẩm ngọt, gia đình có thể khuyến khích sở thích ăn uống lành mạnh ở trẻ thông qua việc cho trẻ tiếp xúc sớm với các mùi vị.

Tác động đến nhận biết và sở thích mùi vị của trẻ nhỏ vì sức khỏe lâu dài

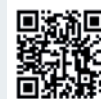

Supplement: Supplementary file 4 [file 6 › 7.Vietnamese_NESTLE_infographic_FINAL_210x280[1].pdf]
